# Supplementary material for: Hydro-Geochemistry of the River Water in the Jiulongjiang River Basin, Southeast China: Implications of Anthropogenic Inputs and Chemical Weathering
Source: PubMed Central journal article supplement (PMC6388126; doi:10.3390/ijerph16030440), 2019-02-02
Supplement: ijerph-16-00440-s001.pdf [file ijerph-16-00440-s001.pdf]

**Table S1.** The physical-chemical parameters and major ions concentration in the JR.

| Samples | Rivers        | T<br>(°C) | EC<br>(µs/cm) | pH  | Na <sup>+</sup> | K <sup>+</sup> | Ca <sup>2+</sup> | Mg <sup>2+</sup> | Cl <sup>-</sup> | SO <sub>4</sub> <sup>2-</sup> | NO <sub>3</sub> <sup>-</sup> | HCO <sub>3</sub> <sup>-</sup> | SiO <sub>2</sub> | TDS <sup>a</sup> | TZ <sup>+</sup> | TZ <sup>-</sup> | NICB <sup>b</sup> |  |
|---------|---------------|-----------|---------------|-----|-----------------|----------------|------------------|------------------|-----------------|-------------------------------|------------------------------|-------------------------------|------------------|------------------|-----------------|-----------------|-------------------|--|
|         |               |           |               |     | (mg/L)          |                |                  |                  |                 |                               |                              |                               |                  | (ueq/L)          |                 | (%)             |                   |  |
| Summer  |               |           |               |     |                 |                |                  |                  |                 |                               |                              |                               |                  |                  |                 |                 |                   |  |
| JL-1    | Wanan R.      | 21.1      | 17.8          | 7.6 | 1.6             | 1.1            | 1.5              | 0.3              | 0.9             | 1.4                           | 0.9                          | 7.5                           | 11.8             | 23.2             | 194.2           | 192.9           | 0.7               |  |
| JL-2    | Wanan R.      | 23.6      | 27.6          | 7.0 | 2.0             | 1.4            | 2.1              | 0.4              | 1.0             | 2.9                           | 2.4                          | 7.9                           | 12.5             | 28.6             | 265.6           | 255.4           | 3.8               |  |
| JL-3    | Wanan R.      | 23.4      | 41.3          | 6.7 | 2.1             | 1.8            | 3.5              | 0.9              | 1.2             | 5.4                           | 3.9                          | 11.5                          | 12.7             | 37.2             | 386.6           | 398.1           | -3.0              |  |
| JL-4    | Yanshi R.     | 25.0      | 359.8         | 7.0 | 13.6            | 2.5            | 29.9             | 13.2             | 23.6            | 92.3                          | 6.2                          | 32.9                          | 11.3             | 209.1            | 3233.7          | 3228.9          | 0.2               |  |
| JL-5    | North R.      | 24.1      | 162.6         | 7.0 | 2.9             | 2.1            | 15.7             | 7.2              | 2.8             | 46.7                          | 6.5                          | 21.1                          | 12.6             | 106.9            | 1552.4          | 1500.8          | 3.3               |  |
| JL-6    | Xinqiao R.    | 25.0      | 102.1         | 7.7 | 1.8             | 1.7            | 13.2             | 2.8              | 2.0             | 10.6                          | 4.1                          | 36.6                          | 13.8             | 68.3             | 1014.5          | 942.5           | 7.1               |  |
| JL-7    | Shuangyang R. | 23.6      | 57.6          | 7.3 | 1.5             | 1.4            | 7.1              | 1.5              | 1.2             | 4.3                           | 3.5                          | 22.5                          | 11.6             | 43.3             | 580.0           | 548.8           | 5.4               |  |
| JL-8    | Xinqiao R.    | 25.5      | 111.9         | 7.9 | 1.9             | 1.8            | 14.4             | 3.1              | 2.1             | 12.1                          | 4.3                          | 39.4                          | 14.2             | 73.6             | 1098.5          | 1027.0          | 6.5               |  |
| JL-9    | North R.      | 24.6      | 151.7         | 7.1 | 2.6             | 1.9            | 13.1             | 5.0              | 2.2             | 28.7                          | 3.7                          | 26.0                          | 12.5             | 82.6             | 1228.9          | 1144.1          | 6.9               |  |
| JL-10   | North R.      | 25.5      | 162.5         | 7.1 | 5.5             | 2.0            | 14.6             | 5.5              | 7.6             | 34.6                          | 9.4                          | 23.8                          | 16.9             | 107.8            | 1469.3          | 1475.1          | -0.4              |  |
| JL-11   | Xinan R.      | 24.8      | 81.1          | 7.5 | 2.0             | 1.6            | 10.9             | 1.7              | 1.6             | 2.6                           | 2.9                          | 38.1                          | 14.7             | 56.9             | 806.4           | 769.1           | 4.6               |  |
| JL-12   | North R.      | 24.6      | 134.4         | 7.1 | 3.6             | 2.1            | 12.9             | 4.9              | 2.9             | 32.7                          | 5.0                          | 22.5                          | 12.8             | 88.0             | 1256.3          | 1210.4          | 3.7               |  |
| JL-13   | Xiazhe R.     | 25.3      | 35.3          | 7.4 | 2.3             | 2.1            | 2.7              | 0.3              | 1.3             | 2.2                           | 2.8                          | 11.9                          | 18.0             | 37.6             | 313.7           | 322.6           | -2.9              |  |
| JL-14   | North R.      | 24.5      | 127.3         | 6.9 | 3.5             | 2.2            | 12.0             | 4.4              | 4.5             | 29.1                          | 4.4                          | 17.9                          | 12.2             | 81.2             | 1170.7          | 1097.7          | 6.2               |  |
| JL-15   | North R.      | 25.2      | 130.0         | 7.3 | 3.3             | 2.1            | 12.6             | 4.5              | 2.7             | 29.6                          | 4.8                          | 21.8                          | 13.6             | 84.0             | 1196.6          | 1127.8          | 5.8               |  |
| JL-16   | Xiandu R.     | 24.9      | 55.3          | 7.6 | 3.6             | 2.3            | 4.5              | 1.0              | 1.7             | 2.5                           | 10.0                         | 15.0                          | 19.2             | 52.2             | 521.8           | 506.2           | 3.0               |  |
| JL-17   | North R.      | 25.0      | 125.3         | 7.2 | 3.3             | 2.1            | 11.8             | 4.2              | 3.2             | 28.1                          | 4.7                          | 20.1                          | 13.2             | 80.6             | 1133.4          | 1079.6          | 4.8               |  |
| JL-18   | North R.      | 25.5      | 123.1         | 7.2 | 4.0             | 2.1            | 11.0             | 3.8              | 4.5             | 25.1                          | 5.1                          | 19.2                          | 11.9             | 77.1             | 1090.5          | 1046.7          | 4.0               |  |
| JL-19   | North R.      | 25.8      | 122.0         | 7.2 | 4.0             | 2.1            | 10.8             | 3.7              | 4.5             | 24.4                          | 6.8                          | 17.9                          | 12.3             | 77.6             | 1069.4          | 1040.0          | 2.8               |  |
| JL-20   | North R.      | 25.9      | 123.5         | 7.1 | 4.1             | 2.1            | 10.9             | 3.6              | 4.7             | 24.7                          | 7.2                          | 17.9                          | 12.4             | 78.7             | 1075.7          | 1057.3          | 1.7               |  |
| JL-21   | Longjing R.   | 31.9      | 96.2          | 7.6 | 5.3             | 3.4            | 6.8              | 1.4              | 4.3             | 4.0                           | 12.9                         | 20.7                          | 18.5             | 66.9             | 775.4           | 749.0           | 3.4               |  |
| JL-22   | North R.      | 26.4      | 128.1         | 7.0 | 4.1             | 2.4            | 11.3             | 3.5              | 3.9             | 23.6                          | 7.4                          | 20.7                          | 13.0             | 79.5             | 1085.7          | 1061.0          | 2.3               |  |
| JL-23   | North R.      | 28.4      | 130.6         | 7.1 | 4.0             | 2.4            | 10.9             | 3.6              | 4.1             | 24.2                          | 6.0                          | 19.6                          | 13.4             | 78.4             | 1074.4          | 1038.2          | 3.4               |  |
| JL-24   | Chuanchang R. | 24.3      | 66.0          | 7.2 | 2.5             | 2.7            | 5.0              | 0.8              | 1.7             | 3.9                           | 6.8                          | 15.0                          | 13.6             | 44.4             | 490.8           | 484.8           | 1.2               |  |
| JL-25   | Chuanchang R. | 25.1      | 59.0          | 7.3 | 3.3             | 2.8            | 4.9              | 0.8              | 2.1             | 3.9                           | 7.4                          | 14.8                          | 15.7             | 48.3             | 521.4           | 503.6           | 3.4               |  |
| JL-26   | Chuanchang R. | 25.0      | 78.0          | 7.4 | 3.8             | 2.9            | 5.2              | 0.9              | 2.0             | 3.9                           | 8.8                          | 15.6                          | 16.2             | 51.5             | 575.0           | 534.8           | 7.0               |  |
| JL-27   | Chuanchang R. | 24.9      | 74.0          | 7.4 | 3.2             | 2.7            | 5.5              | 1.0              | 2.3             | 4.0                           | 9.4                          | 15.0                          | 16.4             | 52.0             | 569.9           | 545.3           | 4.3               |  |
| JL-28   | Huashan R.    | 28.0      | 198.0         | 6.7 | 6.6             | 7.9            | 17.2             | 4.6              | 8.2             | 10.7                          | 69.0                         | 9.3                           | 21.4             | 150.4            | 1730.7          | 1721.0          | 0.6               |  |
| JL-29   | West R.       | 25.5      | 118.0         | 7.1 | 4.3             | 4.3            | 9.4              | 2.1              | 4.3             | 6.5                           | 25.2                         | 14.6                          | 20.3             | 83.6             | 939.0           | 902.3           | 3.9               |  |
| JL-30   | Longshan R.   | 26.4      | 91.0          | 6.9 | 6.5             | 2.9            | 7.5              | 1.2              | 4.5             | 4.8                           | 9.3                          | 26.5                          | 19.3             | 69.1             | 826.8           | 809.4           | 2.1               |  |
| JL-31   | West R.       | 27.3      | 124.0         | 7.0 | 6.5             | 4.9            | 10.3             | 2.3              | 5.9             | 7.8                           | 23.6                         | 21.6                          | 22.4             | 94.4             | 1109.7          | 1062.2          | 4.3               |  |
| JL-32   | West R.       | 28.0      | 180.0         | 6.9 | 9.1             | 5.8            | 14.9             | 2.6              | 10.7            | 11.9                          | 28.0                         | 37.5                          | 18.8             | 120.7            | 1504.1          | 1617.1          | -7.5              |  |
| JL-33   | West R.       | 27.8      | 236.0         | 7.0 | 17.2            | 7.0            | 18.3             | 3.5              | 21.1            | 19.6                          | 16.7                         | 49.0                          | 18.7             | 146.7            | 2130.5          | 2078.0          | 2.5               |  |
| JL-34   | South R.      | 28.8      | 77.4          | 7.3 | 4.6             | 3.5            | 5.0              | 1.1              | 3.6             | 3.5                           | 12.0                         | 15.2                          | 21.5             | 62.3             | 631.8           | 617.0           | 2.4               |  |
| JL-35   | South R.      | 29.6      | 105.8         | 7.0 | 6.2             | 4.0            | 7.0              | 1.6              | 5.2             | 4.3                           | 17.0                         | 20.5                          | 24.8             | 80.3             | 847.6           | 846.9           | 0.1               |  |
| JL-36   | South R.      | 31.5      | 172.0         | 7.0 | 13.0            | 5.1            | 8.0              | 2.6              | 16.9            | 6.7                           | 16.3                         | 26.2                          | 24.5             | 106.1            | 1305.2          | 1307.6          | -0.2              |  |
| JL-37   | South R.      | 31.0      | 572.0         | 7.0 | 64.7            | 7.9            | 13.1             | 9.9              | 110.4           | 20.7                          | 12.8                         | 38.4                          | 20.4             | 279.0            | 4483.0          | 4380.2          | 2.3               |  |
| JL-38   | Estuary       | 27.3      | 37.9          | 7.0 | 6.1             | 3.6            | 11.1             | 2.9              | 6.7             | 15.9                          | 13.9                         | 22.5                          | 16.2             | 87.6             | 1148.5          | 1114.4          | 3.0               |  |
| JL-39   | Estuary       | 27.2      | 139.7         | 7.0 | 6.3             | 3.5            | 10.9             | 3.0              | 7.4             | 16.9                          | 13.2                         | 21.6                          | 15.5             | 87.5             | 1154.0          | 1127.1          | 2.3               |  |
| JL-40   | Estuary       | 27.1      | 135.1         | 7.0 | 5.9             | 3.0            | 10.9             | 3.3              | 6.8             | 20.4                          | 11.4                         | 20.5                          | 14.6             | 86.5             | 1145.6          | 1136.6          | 0.8               |  |
| JL-41   | Estuary       | 27.9      | 1482.0        | 7.0 | 189.1           | 11.2           | 19.5             | 26.4             | 367.2           | 6.8                           | 50.3                         | 32.0                          | 14.2             | 700.7            | 11650.0         | 11836.0         | -1.6              |  |
| JL-42   | Estuary       | 27.0      | 160.6         | 7.1 | 8.1             | 3.2            | 12.3             | 3.9              | 10.8            | 25.7                          | 7.7                          | 20.7                          | 12.0             | 94.0             | 1369.1          | 1303.2          | 4.8               |  |

Continued on next page

| Samples | Rivers       | T<br>(°C) | EC<br>(µs/cm) | pH  | Na <sup>+</sup> | K <sup>+</sup> | Ca <sup>2+</sup> | Mg <sup>2+</sup> | Cl <sup>-</sup> | SO <sub>4</sub> <sup>2-</sup> | NO <sub>3</sub> <sup>-</sup> | HCO <sub>3</sub> <sup>-</sup> | SiO <sub>2</sub> | TDS <sup>a</sup> | TZ <sup>+</sup> | TZ <sup>-</sup> | NICB <sup>b</sup> |
|---------|--------------|-----------|---------------|-----|-----------------|----------------|------------------|------------------|-----------------|-------------------------------|------------------------------|-------------------------------|------------------|------------------|-----------------|-----------------|-------------------|
|         |              |           |               |     | (mg/L)          |                |                  |                  |                 |                               |                              |                               |                  |                  | (ueq/L)         | (%)             |                   |
| Winter  |              |           |               |     |                 |                |                  |                  |                 |                               |                              |                               |                  |                  |                 |                 |                   |
| JL-1    | Wanan R.     | 11.0      | 26.8          | 7.0 | 1.6             | 1.1            | 1.9              | 0.3              | 1.1             | 2.0                           | 1.8                          | 7.6                           | 10.2             | 23.8             | 215.2           | 227.7           | -5.8              |
| JL-2    | Wanan R      | 15.2      | 33.5          | 6.3 | 2.2             | 1.7            | 2.7              | 0.6              | 1.2             | 3.7                           | 3.0                          | 12.4                          | 11.3             | 32.7             | 327.6           | 361.6           | -10.4             |
| JL-3    | Wanan R      | 15.5      | 66.6          | 6.9 | 3.0             | 2.7            | 5.1              | 1.1              | 1.5             | 7.8                           | 7.0                          | 15.9                          | 11.3             | 47.4             | 540.6           | 579.1           | -7.1              |
| JL-4    | Yanshi R     | 14.6      | 430           | 7.2 | 21.4            | 5.6            | 43.6             | 8.0              | 28.5            | 71.5                          | 14.1                         | 84.9                          | 11.2             | 246.3            | 3902.6          | 3912.2          | -0.2              |
| JL-5    | North R      | 18.7      | 150.3         | 7.1 | 6.7             | 3.3            | 14.4             | 2.9              | 6.6             | 23.2                          | 7.9                          | 30.6                          | 12.8             | 92.9             | 1327.6          | 1297.3          | 2.3               |
| JL-6    | Xinqiao R    | 12.5      | 137.9         | 7.4 | 2.9             | 2.8            | 18.5             | 3.1              | 2.5             | 13.3                          | 6.2                          | 50.8                          | 10.3             | 84.9             | 1378.9          | 1278.2          | 7.3               |
| JL-7    | Shuangyang R | 15.1      | 97.2          | 7.4 | 2.3             | 2.8            | 12.5             | 1.9              | 2.2             | 8.8                           | 6.3                          | 31.3                          | 9.1              | 61.3             | 944.2           | 858.5           | 9.1               |
| JL-8    | Xinqiao R    | 14.5      | 138.9         | 7.8 | 2.9             | 2.8            | 19.2             | 3.1              | 2.6             | 14.4                          | 6.6                          | 48.3                          | 8.8              | 84.5             | 1411.8          | 1270.6          | 10.0              |
| JL-9    | North R      | 18.1      | 234.2         | 7.3 | 11.1            | 3.7            | 23.5             | 5.9              | 10.2            | 49.3                          | 6.8                          | 51.7                          | 12.3             | 148.6            | 2232.9          | 2271.9          | 4.2               |
| JL-10   | North R      | 18.9      | 164.8         | 7.0 | 7.4             | 3.6            | 16.9             | 3.2              | 8.3             | 23.1                          | 7.7                          | 34.9                          | 11.8             | 99.4             | 1516.4          | 1410.3          | 7.0               |
| JL-11   | Xinan R      | 13.3      | 131.3         | 7.5 | 2.5             | 2.1            | 19.3             | 2.6              | 2.0             | 4.5                           | 3.2                          | 61.9                          | 14.1             | 81.2             | 1337.9          | 1216.1          | 9.1               |
| JL-12   | North R      | 15.3      | 183.5         | 7.0 | 12.7            | 4.0            | 17.1             | 3.2              | 7.1             | 34.6                          | 8.2                          | 34.1                          | 12.4             | 116.1            | 1761.3          | 1611.5          | 8.5               |
| JL-13   | Xiazhe R     | 15.9      | 49            | 6.7 | 2.9             | 2.6            | 4.4              | 0.5              | 1.6             | 3.7                           | 4.7                          | 15.4                          | 14.0             | 42.0             | 448.8           | 449.7           | -0.2              |
| JL-14   | North R      | 13.9      | 193.8         | 6.9 | 10.9            | 4.7            | 18.1             | 3.4              | 7.1             | 36.1                          | 10.6                         | 32.2                          | 11.1             | 118.2            | 1772.3          | 1652.3          | 6.8               |
| JL-15   | North R      | 18.1      | 165.4         | 8.3 | 8.6             | 4.3            | 22.3             | 3.2              | 8.6             | 29.7                          | 11.3                         | 35.9                          | 8.7              | 114.7            | 1861.5          | 1632.9          | 12.3              |
| JL-16   | Xiandu R     | 16.9      | 82.4          | 7.4 | 5.6             | 2.9            | 7.0              | 1.4              | 2.5             | 3.8                           | 11.2                         | 23.0                          | 21.3             | 67.1             | 777.7           | 707.4           | 9.0               |
| JL-17   | North R      | 14.8      | 186.7         | 7.1 | 9.4             | 5.0            | 18.3             | 3.0              | 7.3             | 31.0                          | 11.4                         | 33.3                          | 10.7             | 112.8            | 1700.7          | 1580.7          | 7.1               |
| JL-18   | North R      | 17.6      | 128.1         | 7.0 | 7.4             | 4.3            | 15.3             | 2.3              | 5.4             | 22.1                          | 10.2                         | 29.2                          | 11.6             | 93.2             | 1385.9          | 1256.5          | 9.3               |
| JL-19   | North R      | 15.4      | 131           | 7.1 | 8.0             | 4.5            | 16.2             | 2.5              | 6.0             | 24.5                          | 10.6                         | 28.8                          | 11.1             | 97.7             | 1474.1          | 1322.3          | 10.3              |
| JL-20   | North R      | 15.4      | 125.9         | 7.1 | 7.9             | 4.1            | 15.7             | 2.4              | 6.3             | 23.7                          | 10.3                         | 28.3                          | 11.8             | 96.3             | 1427.9          | 1301.1          | 8.9               |
| JL-21   | Longjing R   | 22.7      | 151.6         | 8.8 | 10.2            | 5.5            | 13.6             | 2.6              | 9.1             | 8.4                           | 14.7                         | 38.9                          | 18.9             | 102.4            | 1477.2          | 1305.0          | 11.7              |
| JL-22   | North R      | 18.6      | 155.4         | 7.5 | 9.9             | 4.6            | 17.5             | 2.7              | 9.5             | 23.9                          | 12.0                         | 31.3                          | 11.8             | 107.5            | 1642.4          | 1474.5          | 10.2              |
| JL-23   | North R      | 18.4      | 178.7         | 7.3 | 9.2             | 4.7            | 18.0             | 2.8              | 10.0            | 24.2                          | 11.9                         | 33.3                          | 11.4             | 108.7            | 1649.5          | 1522.5          | 7.7               |
| JL-24   | Chuanchang R | 13.9      | 103.1         | 6.9 | 4.5             | 3.8            | 8.2              | 1.2              | 2.6             | 4.2                           | 5.1                          | 39.3                          | 17.1             | 66.3             | 797.7           | 886.5           | -11.1             |
| JL-25   | Chuanchang R | 14.3      | 141.5         | 6.9 | 20.0            | 4.8            | 9.3              | 1.5              | 22.6            | 7.1                           | 8.8                          | 34.0                          | 19.7             | 110.7            | 1580.7          | 1482.0          | 6.2               |
| JL-26   | Chuanchang R | 15.0      | 101.3         | 6.7 | 5.1             | 3.6            | 7.7              | 1.1              | 3.1             | 4.9                           | 12.2                         | 33.6                          | 17.9             | 72.3             | 792.0           | 934.7           | -18.0             |
| JL-27   | Chuanchang R | 16.5      | 128           | 6.8 | 9.6             | 5.0            | 12.1             | 1.8              | 6.8             | 10.3                          | 8.0                          | 48.1                          | 19.3             | 96.9             | 1297.7          | 1322.5          | -1.9              |
| JL-28   | Huashan R    | 15.4      | 230.8         | 7.1 | 11.2            | 8.7            | 19.1             | 4.1              | 12.9            | 17.5                          | 52.0                         | 22.5                          | 20.7             | 157.3            | 1995.6          | 1934.6          | 3.1               |
| JL-29   | West R       | 16.0      | 230.8         | 7.0 | 13.8            | 8.2            | 18.4             | 3.9              | 12.9            | 16.8                          | 44.6                         | 30.6                          | 20.7             | 154.7            | 2048.0          | 1936.4          | 5.4               |
| JL-30   | Longshan R   | 14.6      | 173.3         | 6.9 | 14.7            | 5.0            | 13.5             | 1.6              | 9.5             | 10.7                          | 8.9                          | 55.4                          | 19.3             | 110.8            | 1573.3          | 1540.6          | 2.1               |
| JL-31   | West R       | 15.7      | 199.4         | 7.1 | 12.2            | 7.7            | 16.0             | 3.0              | 10.0            | 16.5                          | 32.2                         | 34.5                          | 18.3             | 133.0            | 1771.8          | 1708.6          | 3.6               |
| JL-32   | West R       | 19.9      | 280.9         | 7.2 | 19.8            | 9.2            | 19.9             | 3.4              | 23.6            | 20.8                          | 20.5                         | 54.5                          | 18.3             | 162.6            | 2368.4          | 2321.3          | 2.0               |
| JL-33   | West R       | 17.7      | 253.4         | 7.1 | 23.4            | 10.0           | 20.4             | 4.0              | 28.3            | 22.7                          | 25.6                         | 48.7                          | 19.0             | 177.6            | 2621.7          | 2479.9          | 5.4               |
| JL-34   | South R      | 20.1      | 161.8         | 7.0 | 10.6            | 6.3            | 14.5             | 2.9              | 9.4             | 7.5                           | 13.1                         | 54.5                          | 27.8             | 119.4            | 1581.3          | 1525.9          | 3.5               |
| JL-35   | South R      | 20.1      | 200.1         | 7.3 | 17.8            | 6.6            | 13.8             | 3.3              | 20.4            | 8.8                           | 16.7                         | 40.7                          | 25.5             | 133.1            | 1899.1          | 1692.9          | 10.9              |
| JL-36   | South R      | 18.8      | 295.9         | 7.4 | 30.0            | 8.5            | 14.8             | 4.9              | 42.0            | 15.1                          | 15.3                         | 43.7                          | 23.0             | 175.5            | 2661.9          | 2464.2          | 7.4               |
| JL-37   | South R      | 17.1      | 13628         | 7.6 | 3133.5          | 116.0          | 102.4            | 360.7            | 5543.2          | 737.7                         | 11.8                         | 81.7                          | 10.5             | 10056.7          | 174000          | 173252          | 0.4               |
| JL-38   | Estuary      | 16.7      | 674           | 7.4 | 87.9            | 10.9           | 22.8             | 12.1             | 139.2           | 39.7                          | 19.2                         | 50.8                          | 15.6             | 372.7            | 6232.3          | 5895.8          | 5.4               |
| JL-39   | Estuary      | 17.4      | 7300          | 7.4 | 1620.0          | 58.7           | 58.6             | 182.6            | 2790.7          | 386.3                         | 14.4                         | 68.6                          | 12.3             | 5158.0           | 89892           | 88122           | 2.0               |
| JL-40   | Estuary      | 17.0      | 6956          | 7.3 | 1542.7          | 59.1           | 54.7             | 171.9            | 2694.2          | 373.0                         | 14.5                         | 67.8                          | 12.3             | 4956.2           | 85464           | 85107           | 0.4               |
| JL-41   | Estuary      | 17.8      | 7990          | 7.3 | 1742.7          | 68.2           | 64.8             | 206.6            | 3089.8          | 424.7                         | 13.7                         | 69.0                          | 12.6             | 5657.6           | 97747           | 97353           | 0.4               |
| JL-42   | Estuary      | 16.3      | 1336          | 7.2 | 231.0           | 17.5           | 28.2             | 28.6             | 424.2           | 83.3                          | 14.3                         | 49.5                          | 13.1             | 864.8            | 14251           | 14740           | -3.4              |

<sup>a</sup> TDS: total dissolved solid. <sup>b</sup> NICB: Normalized Inorganic Charge Balance, NICB = (TZ<sup>+</sup> - TZ<sup>-</sup>) / TZ<sup>-</sup> × 100.
